# Supplementary material
Source: publisher figshare collection journal article supplement (https://diabetesjournals.figshare.com/articles/dataset/_/21256476)
Supplement: Supplementary file 1 [file 1]

# The Experience and Challenges Associated With the Use of High Doses of Insulin: Insights From Patients and Providers

Jennifer Goldman,<sup>1</sup> Eugenio Angueira-Serrano,<sup>2</sup> Jeffrey Gonzalez,<sup>3</sup> Christianne Pang,<sup>5</sup> Jacqueline Tait,<sup>5</sup> Steven Edelman<sup>6</sup>

<sup>1</sup>Massachusetts College of Pharmacy and Health Sciences, Boston, MA, and Well Life Medical, Peabody, MA; <sup>2</sup>Larkin Community Hospital, Miami, FL, and Lake Erie College of Osteopathic Medicine, Erie, PA;

<sup>3</sup>Yeshiva University and Albert Einstein College of Medicine, Bronx, NY; <sup>4</sup>Sanofi, Bridgewater, NJ; <sup>5</sup>dQ&A – The Diabetes Research Company, San Francisco, CA; <sup>6</sup>University of California San Diego, Veterans Affairs Medical Center, Taking Control Of Your Diabetes, CA

## Background

## Objectives

## Methods

## Key Findings

## Conclusions

## BACKGROUND

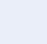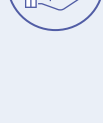

Daily basal insulin needs of people with type 2 diabetes (T2D) change. Depending upon individual needs this can result in an increase or decrease in their daily basal dose requirement, leading to people with T2D needing to manage their daily basal insulin needs. As T2D progresses and the dose of insulin increases, the number of insulin pens/vials needed increases, as well as the likelihood that prefilled pens/vials will not contain an exact multiple of doses needed to fulfill the dose

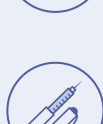

There is often a disconnect between healthcare providers (HCPs) and people with T2D regarding the extent to which the burdens and emotional stressors associated with insulin therapy affect a person's ability to adhere to insulin therapy

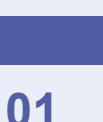

There are no studies that have assessed whether high-capacity pens can improve how people take insulin therapy

## OBJECTIVES

### 01

**GAIN INSIGHTS** of the patient experience and quantify the challenges faced by people using high doses ( $\geq 50$  units/day) of basal insulin

### 02

**ASSESS** the commonalities and disconnects between the perspectives of the basal injection experience between people with T2D and HCPs

### 03

**MEASURE** the preferences and importance placed on basal insulin pen features among HCPs and people with T2D

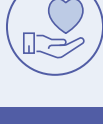

**The HCP-patient relationship is at the root of all care decisions**

This study was conducted to more fully understand and appreciate the challenges experienced by people with T2D using high dose basal insulin from both the HCP and patient perspectives

## METHODS

### STUDY POPULATION

#### People with T2D

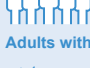

##### Adults with T2D

- $\geq 1$  year on  $\geq 50$  units/day of basal insulin (pen or syringe)
- Used their current brand of basal insulin for  $\geq 1$  year

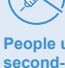

People using second-generation basal insulins and high-capacity pens were excluded

#### HCPs

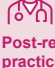

##### Post-residency practice for 2–35 years

- $\geq 150$  patients a month
- $\geq 50\%$  of time in office-based practice/clinic or private group/solo practice

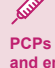

PCPs treated  $\geq 50$ , and endocrinologists  $\geq 80$  patients per month with T2D

- Prescribed insulin therapy for  $\geq 25\%$  of T2D patients

- Online quantitative surveys were conducted with people with T2D during 9 July–18 August 2021; HCPs completed surveys during 29 July–13 August 2021
- The surveys contained questions on basal insulin usage to identify challenges associated with the injection experience, as well as pen familiarity and a blinded concept test
- In the blinded concept test, respondents were shown “insulin pen x,” which had the following profile (Toujeo Max Solostar characteristics): 900-unit capacity, maximum injection of 160 units, 5-second hold time, concentration/injection volume of 300 units, dial that extends, 8-week shelf life, and 2-U dose increment

## KEY FINDINGS

### PERCEPTION OF INJECTION EXPERIENCE

#### People with T2D

Wasting insulin was reported by **57%** of respondents

**33%** reported wasting insulin more than once a month

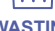

#### WASTING INSULIN

#### HCPs

**48%** of HCPs were aware of insulin wasting; they estimated that 43% of people with T2D were doing so

HCPs estimated that **25%** of patients wasted insulin more than once a month

HCPs underestimated the proportion of people wasting insulin

Shorting insulin was reported by **31%**

**7%** of whom were doing so more than once a month

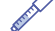

#### SHORTING INSULIN<sup>a</sup>

**49%** of HCPs believed people with T2D were shorting their dose

Of these, they estimated **33%** of people were doing so, and that **19%** were doing so more than once a month

HCPs underestimated the proportion of people shorting insulin

**41%** of people on  $>1$  basal insulin injection/day strongly agreed that they would prefer to take only one basal insulin injection every day

**32%** of people on  $>1$  basal insulin injection/day strongly agreed that one less injection per day would make a meaningful difference to injection burden

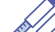

#### BURDEN OF TWO INJECTIONS

**65%** of HCPs strongly agreed that people prefer to take only one basal insulin injection every day

**52%** of HCPs strongly agreed that one less injection per day would make a meaningful difference to injection burden

HCPs underestimated the willingness of people to take injections back-to-back

Missing long-acting insulin doses was reported by **38%** of all people with T2D

**47%** of people receiving  $>1$  basal insulin injection/day reported missing doses

**17%** of people receiving  $>1$  basal insulin injection/day strongly agreed that missing injections negatively affected blood glucose control

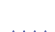

#### ADHERENCE ISSUES

**63%** of HCPs knew that people were skipping insulin doses

They estimated that **28%** of people on  $>50$  units (taking  $\geq 1$  injection/day) were missing their insulin dose

**40%** of HCPs strongly agreed that missing injections negatively affected blood glucose control

HCPs underestimated the proportion of people skipping insulin doses

Injection-site reactions (including pain, bruising, knots and/or bumps) were reported by **68%**

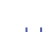

#### INJECTION-SITE REACTIONS

Endocrinologists estimated that **17%** and PCPs estimated that **23%** of people experience injection-site reactions

HCPs underestimated the proportion of people experiencing injection-site reactions

### PEN FAMILIARITY AND BLINDED CONCEPT TEST

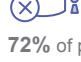

**72%** of people receiving 50–80 units/day and **59%** of those receiving  $>80$  units/day had never heard of high-capacity pens

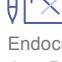

Endocrinologists were more likely than PCPs (**~90% vs ~55%**) to prescribe high-capacity pens

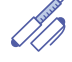

**83%** of people receiving 50–80 units/day, and **91%** of those receiving  $>80$  units/day indicated that they would likely/definitely switch to the concept “insulin pen x”

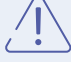

Most people were not aware of high-capacity pens

A smaller proportion of PCPs prescribed high-capacity pens than endocrinologists

### REASONS FOR SWITCHING TO “INSULIN PEN X”

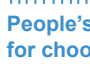

#### People's reasons for choosing pen

■ 50–80 units/day

■  $>80$  units/day

#### Increased convenience

15%

26%

#### Lower injection volume

24%

16%

#### Reduction in the number of pens to store or travel

20%

15%

#### Increased time of use/pen capacity

16%

19%

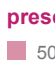

#### HCPs' reasons for prescribing to people

■ 50–80 units/day

■  $>80$  units/day

#### High dose/one dose

20%

37%

#### High capacity/lasts longer

31%

30%

#### Low volume/high concentration

29%

26%

## CONCLUSIONS

### 01

This study highlights a disconnect between people with T2D and HCPs in the behaviors and emotions associated with the use of basal insulin

### 02

People are experiencing challenges associated with therapy, such as wasting and shorting basal insulin, of which HCPs are not aware

### 03

A smaller proportion of PCPs than endocrinologists prescribed high-capacity pens, indicating a need for education of PCPs on their use and suitability for people requiring  $>20$  units of basal insulin per day

### 04

HCPs need to play a key role in helping people overcome these challenges, including connecting with their patients' emotional needs and understanding stressors associated with managing T2D

### 05

HCPs should consider how to encourage more effective communication with their patients to discuss their needs and provide education on long-acting insulin therapy, including available pen devices, to reach a shared decision on the most appropriate device for each individual

<sup>a</sup>Injecting only the amount of insulin left in a pen, and not making the rest of the required dose with a second injection.

Abbreviations: HCP, healthcare provider; PCP, primary care practitioner; T2D, type 2 diabetes.
